# Supplementary material for: One-pot production of ceria nanosheet-supported PtNi alloy nanodendrites with high catalytic performance toward methanol oxidation and oxygen reduction
Source: Royal Society of Chemistry journal article supplement (doi:10.1039/d0ta09310f), 2020-01-01
Supplement: d0ta09310f1.pdf [file d0ta09310f1.pdf]

Electronic supplementary information (ESI) for

**One-pot production of ceria nanosheets-supported PtNi alloy  
nanodendrites with high catalytic performance toward methanol oxidation  
and oxygen reduction**

Yongmin Kwon,<sup>a</sup> Yena Kim,<sup>a</sup> Jong Wook Hong,<sup>b</sup> Youngjoo Whang,<sup>a</sup> Sujung Kim,<sup>a</sup> Dae Han  
Wi,<sup>a</sup> Hye Ryung Byon,<sup>a</sup> and Sang Woo Han<sup>\*a</sup>

<sup>a</sup> Department of Chemistry and KI for the NanoCentury, KAIST, Daejeon 34141, Korea. E-mail: sangwoohan@kaist.ac.kr

<sup>b</sup> Department of Chemistry, University of Ulsan, Ulsan 44610, Korea.

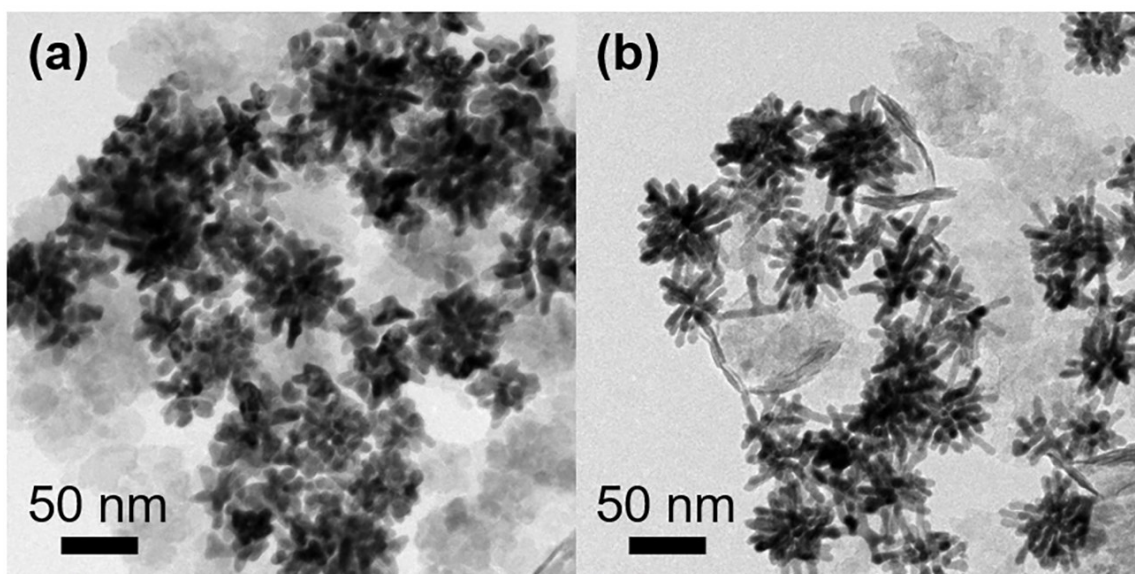

**Fig. S1** TEM images of (a) Pt<sub>3</sub>Ni/ceria and (b) Pt/ceria. The average sizes of the Pt<sub>3</sub>Ni and Pt NDs were  $56.5 \pm 8.7$  and  $58.2 \pm 6.3$  nm, respectively.

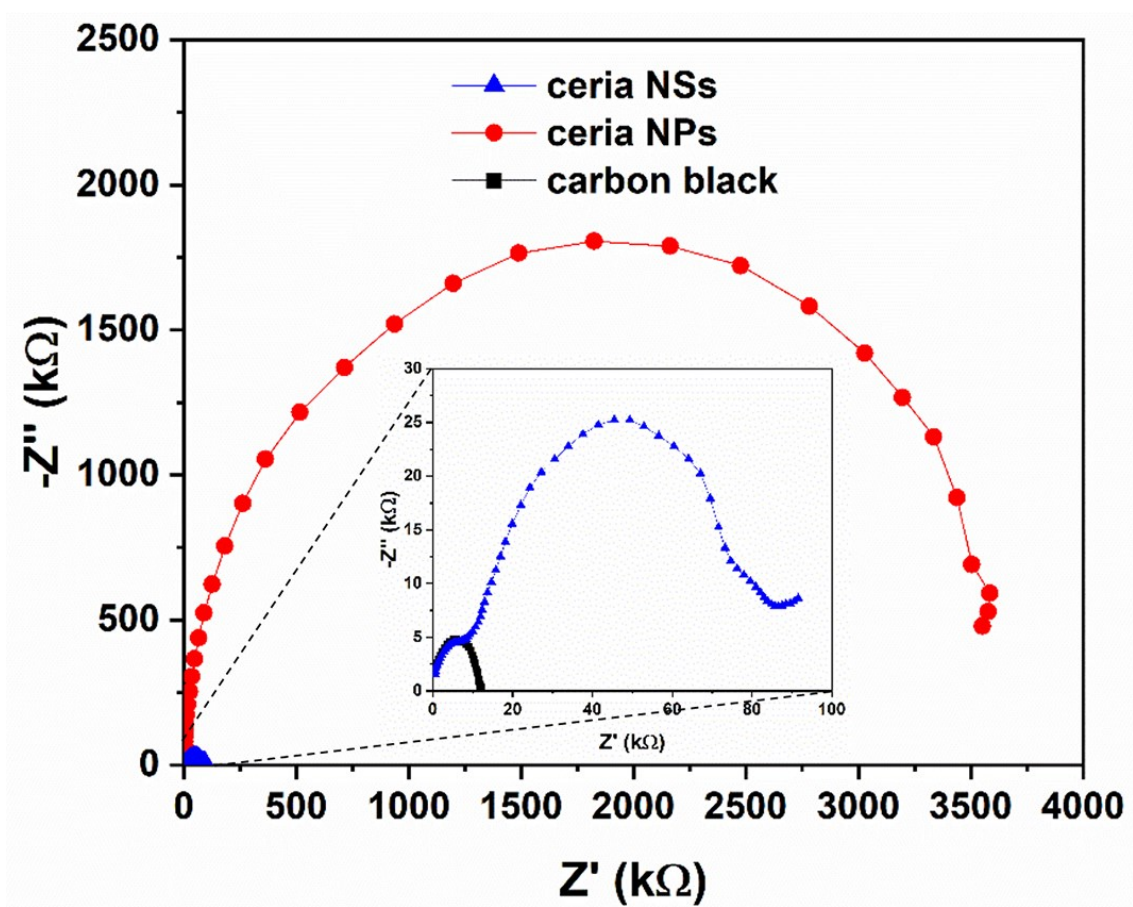

**Fig. S2** Nyquist plots of ceria NSs and NPs. For comparison, the Nyquist plot of carbon black is also included.

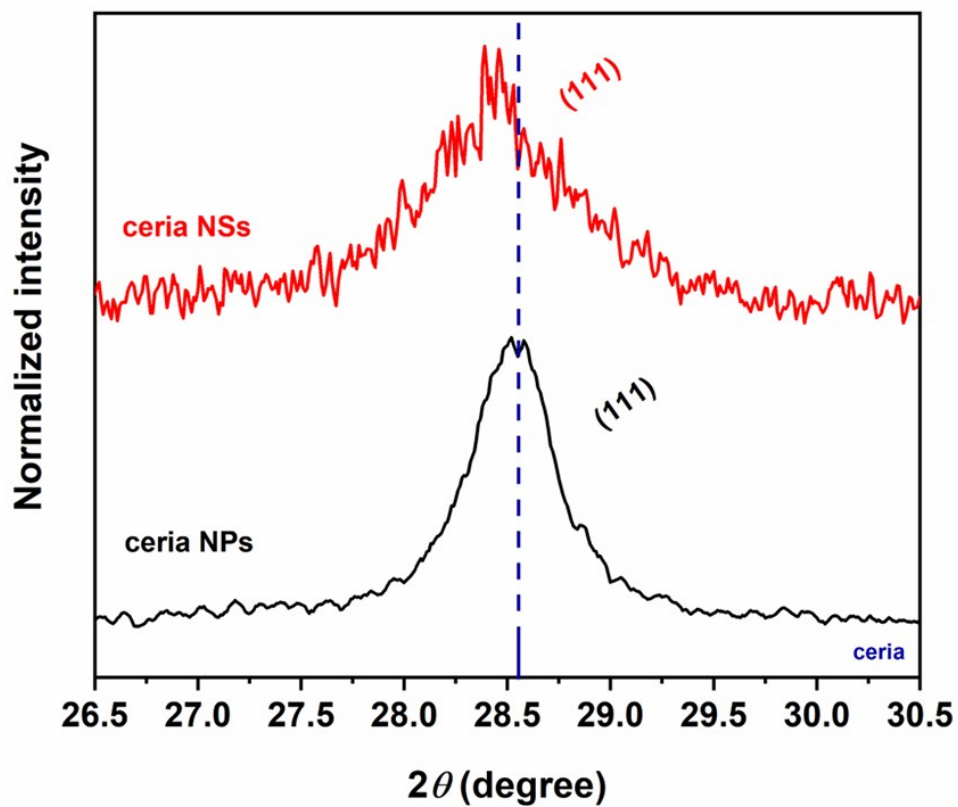

**Fig. S3** XRD patterns of ceria NSs and NPs in the (111) diffraction region. The (111) peak positions of ceria NSs and NPs are  $28.45^\circ$  and  $28.55^\circ$ , respectively.

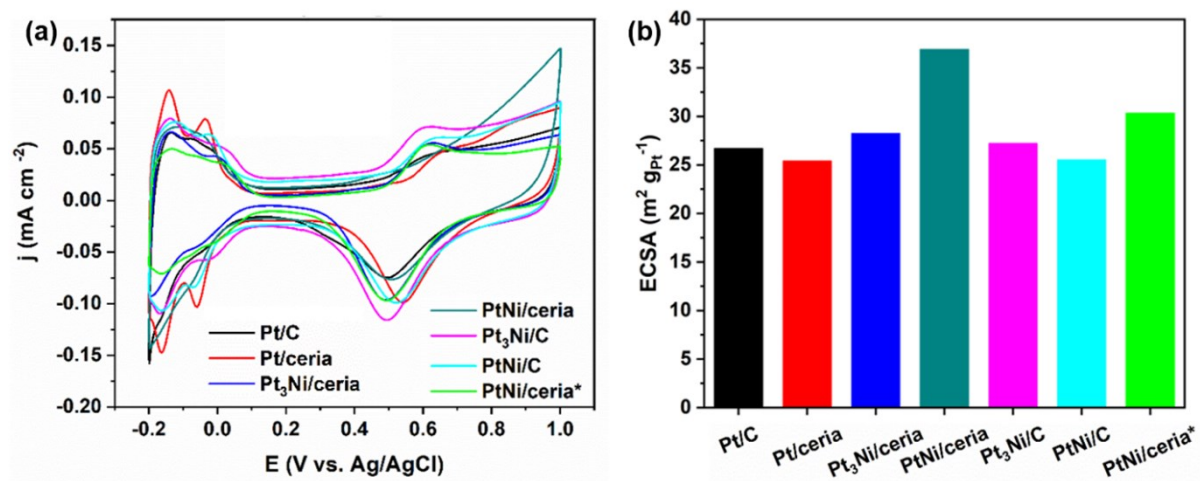

**Fig. S4** (a) CVs of various catalysts in 0.1 M HClO<sub>4</sub> at a scan rate of 50 mV s<sup>-1</sup>. (b) ECSAs of various catalysts. The ECSA values of Pt/C, Pt/ceria, Pt<sub>3</sub>Ni/ceria, PtNi/ceria, Pt<sub>3</sub>Ni/C, PtNi/C, and PtNi/ceria\* were 26.7, 25.4, 28.2, 36.9, 27.2, 25.5, and 30.3 m<sup>2</sup> g<sub>Pt</sub><sup>-1</sup>, respectively. ECSA of each catalyst was estimated by the following equation:  $ECSA = Q_o/q_o$ , where  $Q_o$  is the surface charge that can be obtained from the area under the CV trace of hydrogen desorption and  $q_o$  is the charge required for desorption of monolayer of hydrogen on the Pt surface (210  $\mu\text{C cm}^{-2}$ ).

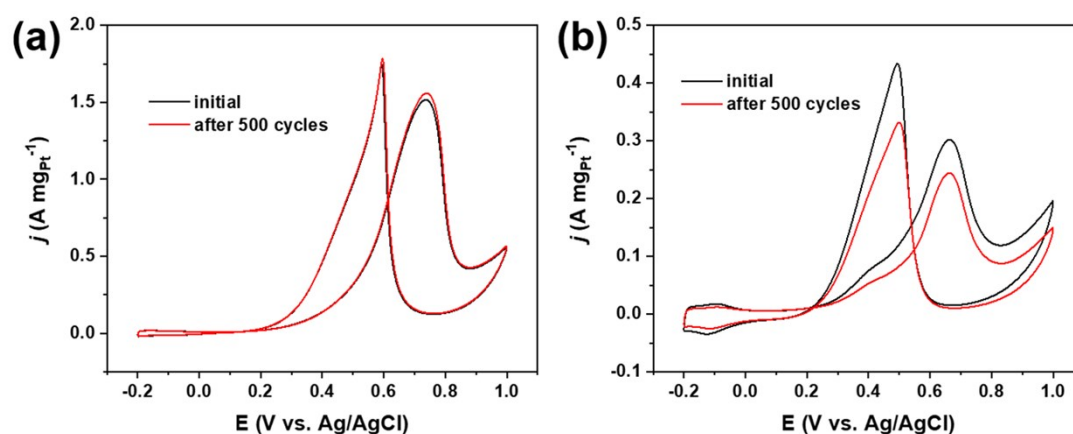

**Fig. S5** CVs of (a) PtNi/ceria and (b) Pt/C in 0.1 M  $\text{HClO}_4$  + 0.5 M methanol at a scan rate  $50 \text{ mV s}^{-1}$  before and after 500 potential cycles between -0.2 and 1.0 V vs. Ag/AgCl.

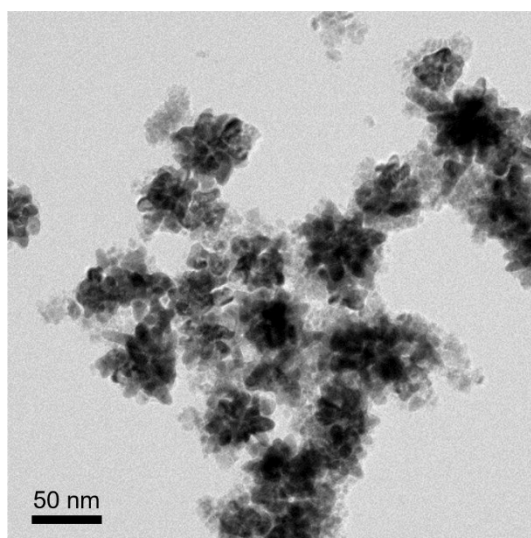

**Fig. S6** TEM image of PtNi/ceria after the ADT, demonstrating that the dendrite structure of PtNi/ceria was preserved after the ADT.

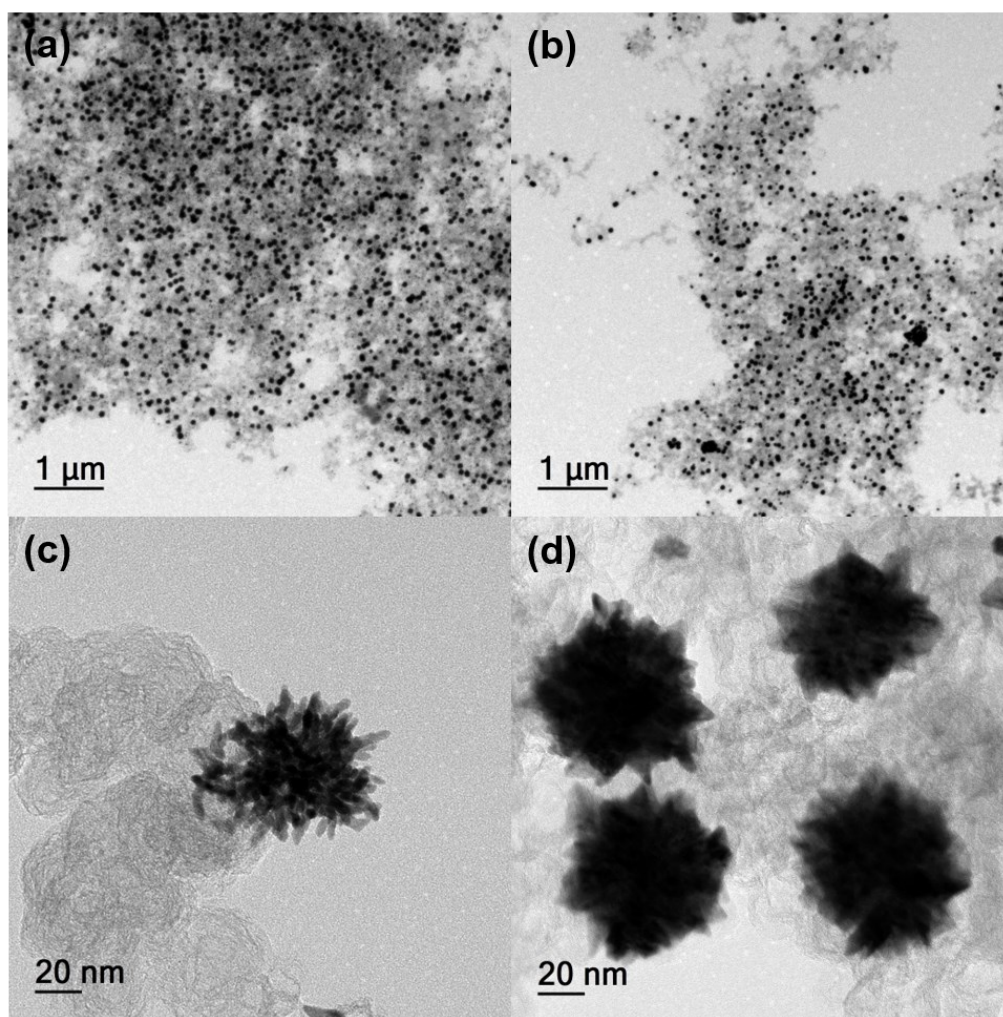

**Fig. S7** TEM images of (a,c) Pt<sub>3</sub>Ni/C and (b,d) PtNi/C. The average sizes of the Pt<sub>3</sub>Ni and PtNi NDs were  $57.1 \pm 6.3$  and  $62.9 \pm 6.1$  nm, respectively.

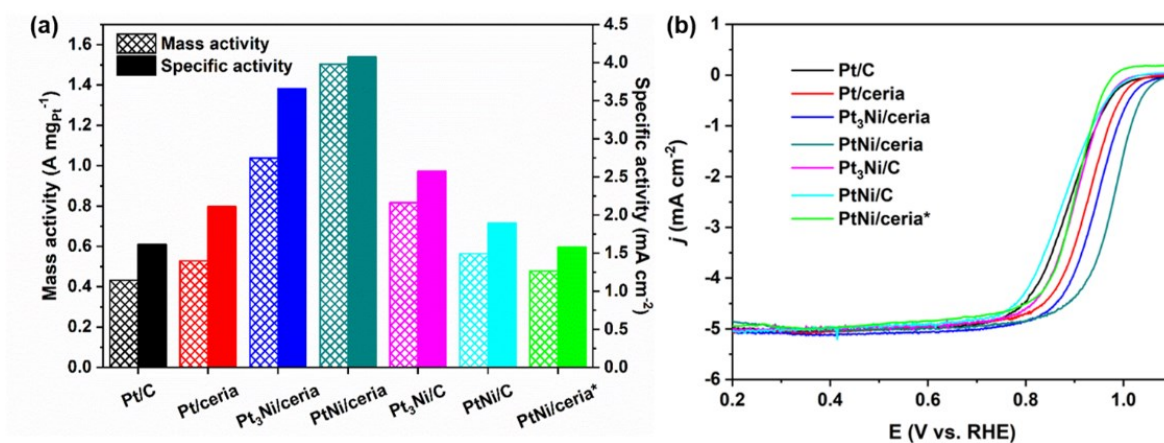

**Fig. S8** (a) Mass and specific activities of various catalysts towards MOR. (b) ORR polarization curves of various catalysts.  $E_{1/2}$  values of Pt/C, Pt/ceria, Pt<sub>3</sub>Ni/ceria, PtNi/ceria, Pt<sub>3</sub>Ni/C, PtNi/C, and PtNi/ceria\* were 0.889, 0.925, 0.944, 0.978, 0.900, 0.876, and 0.898 V vs. RHE, respectively.

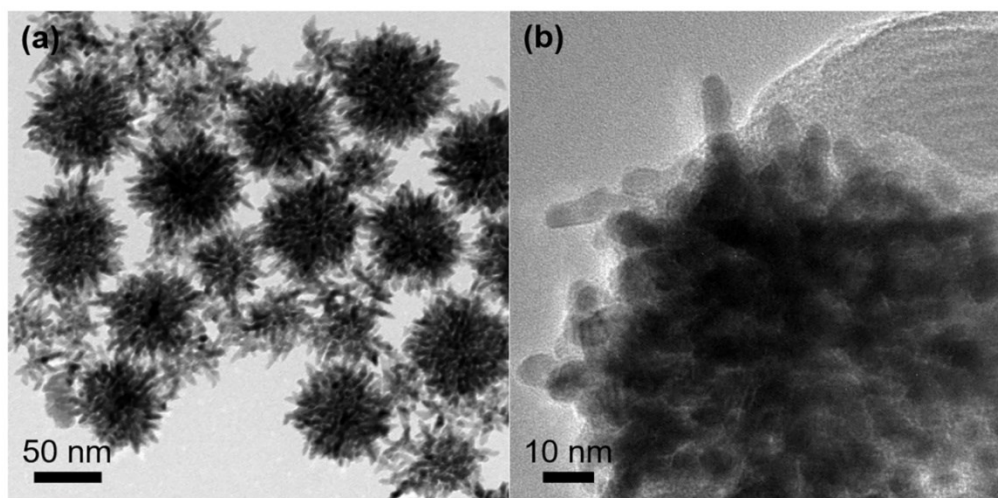

**Fig. S9** TEM images of (a) PtNi NDs and (b) PtNi/ceria\* prepared by depositing the PtNi NDs on pre-synthesized ceria NSs.
